# Supplementary material for: CeO2-Based Two-Dimensional Layered Nanocomposites Derived from a Metal–Organic Framework for Selective Electrochemical Dopamine Sensors
Source: PubMed Central journal article supplement (PMC7506630; doi:10.3390/s20174880), 2020-08-28
Supplement: sensors-20-04880-s001.pdf [file sensors-20-04880-s001.pdf]

## Supplemental information

# CeO<sub>2</sub>-Based Two-Dimensional Layered Nanocomposites Derived from a Metal–Organic Framework for Selective Electrochemical Dopamine Sensors

Chengjie Ge <sup>1</sup>, Rajendran Ramachandran <sup>1,2</sup>, and Fei Wang <sup>1,3,\*</sup>

<sup>1</sup> School of Microelectronics, Southern University of Science and Technology, Shenzhen 518055, China; 11712522@mail.sustech.edu.cn

<sup>2</sup> SUSTech Academy for Advanced Interdisciplinary Studies, Southern University of Science and Technology, Shenzhen 518055, China; ramachandran@sustech.edu.cn

<sup>3</sup> Engineering Research Center of Integrated Circuits for Next-Generation Communications, Ministry of Education, Shenzhen 518055, China;

\* Correspondence author: wangf@sustech.edu.cn

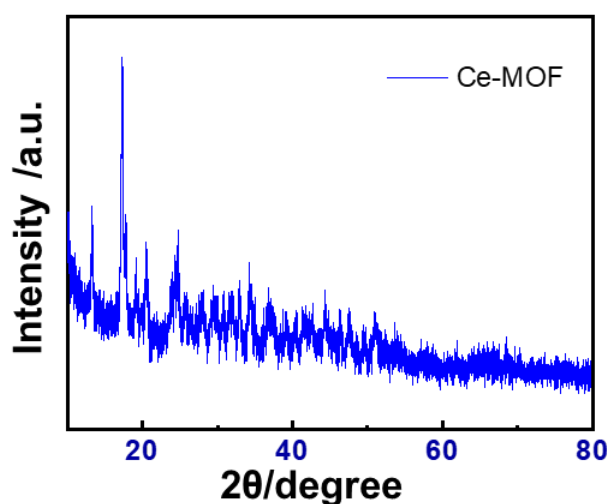

Figure 1. XRD pattern of the Ce-MOF.

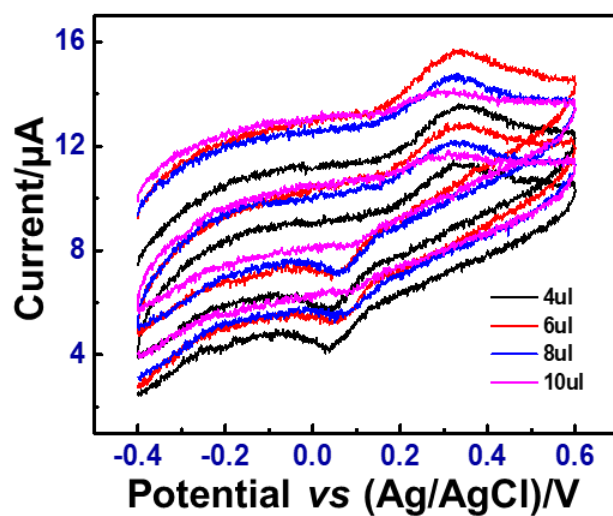

**Figure 2.** Cyclic voltammetry response of different amount of CeO<sub>2</sub>/siloxene loading in 0.4 μM concentration DA containing 0.1M PBS solution.

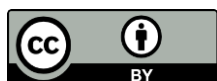

© 2020 by the authors. Submitted for possible open access publication under the terms and conditions of the Creative Commons Attribution (CC BY) license (<http://creativecommons.org/licenses/by/4.0/>).
